# Supplementary material for: Integrated prevention and management of non-communicable diseases, including musculoskeletal health: a systematic policy analysis among OECD countries
Source: PubMed Central journal article supplement — BMJ Glob Health. 2019 Sep 11;4(5):e001806. doi: 10.1136/bmjgh-2019-001806 (PMC6747900; doi:10.1136/bmjgh-2019-001806), 2019-09-11
Supplement: bmjgh-2019-001806supp002.pdf [file bmjgh-2019-001806supp002.pdf]

## Supplementary file 2: PRISMA-aligned flowchart

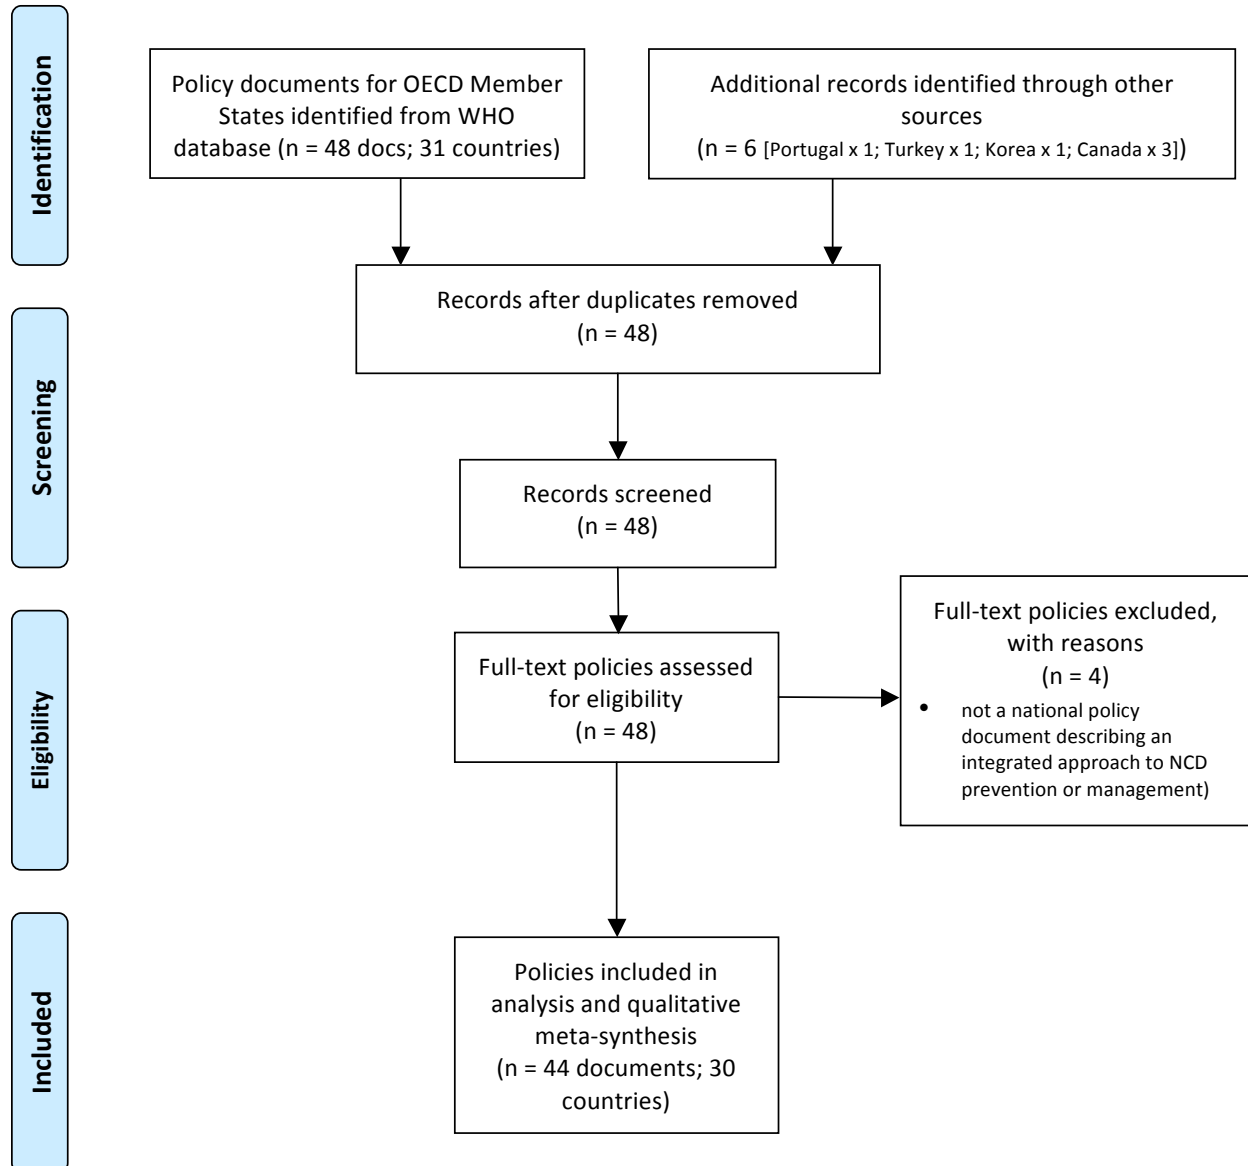

From: Moher D, Liberati A, Tetzlaff J, Altman DG, The PRISMA Group (2009). Preferred Reporting Items for Systematic Reviews and Meta-Analyses: The PRISMA Statement. PLoS Med 6(7): e1000097. doi:10.1371/journal.pmed1000097

For more information, visit [www.prisma-statement.org](http://www.prisma-statement.org).

### Excluded policy documents

1. Rosenberg E, Grotto I, Dweck T, et al. Healthy Israel 2020: Israel's Blueprint for Health Promotion and Disease Prevention. *Public Health Reviews* 2013; 35: 5.
2. De Block M, Vandeurzen J, Prevot M, et al. Protocole d'accord entre l'Autorite fédérale et les Autorités visées aux articles 128, 130 et 135 de la Constitution en matière de prévention. Le Gouvernement Fédéral Belgique: Bruxelles 2016.
3. Public Health Agency of Canada. Strategy on Healthy Living and Chronic Disease Budget 2005. Ottawa: Government of Canada 2005.
4. Presidenza de Congiglio dei Ministri. Conferenza permanente per 1 rapporti tra lo stato, le regioni e le provincie autonome di trento e di bolzano. Intesa ai sensi dell'articolo 8, comma 6 della legge 5 giugno 2003, n.131 sulla proposta del Ministro della salute concernente il Piano nazionale per la prevenzione per gli anni 2014-2018. Roma: Governo d'Italia 2003.

From: Moher D, Liberati A, Tetzlaff J, Altman DG, The PRISMA Group (2009). Preferred Reporting Items for Systematic Reviews and Meta-Analyses: The PRISMA Statement. *PLoS Med* 6(7): e1000097. doi:10.1371/journal.pmed1000097

For more information, visit [www.prisma-statement.org](http://www.prisma-statement.org).
