# Supplementary material for: Integrated prevention and management of non-communicable diseases, including musculoskeletal health: a systematic policy analysis among OECD countries
Source: PubMed Central journal article supplement — BMJ Glob Health. 2019 Sep 11;4(5):e001806. doi: 10.1136/bmjgh-2019-001806 (PMC6747900; doi:10.1136/bmjgh-2019-001806), 2019-09-11
Supplement: bmjgh-2019-001806supp003.pdf [file bmjgh-2019-001806supp003.pdf]

## Supplementary file 3

**Table S3.1** Summary of overarching themes, supported by sub-themes and first-order codes to describe the stated purpose, aim or vision of the included policies. Frequencies of first-order codes are included to provide a measure of prominence and are colour coded for ease of interpretation (red <25%; amber ≥25% to <50%; green ≥50%).

| Theme 1: System strengthening               |                                                                                                                                                                             |                                                 |
|---------------------------------------------|-----------------------------------------------------------------------------------------------------------------------------------------------------------------------------|-------------------------------------------------|
| Subthemes                                   | First-order codes describing aim, purpose or vision of included policies                                                                                                    | Frequency of first-order codes by policy, n (%) |
| 1.1 Governance, financing and the workforce | 1.1.1 Create a framework for disease-specific models of care.                                                                                                               | 1 (2.3)                                         |
|                                             | 1.1.2 Strengthen the public health system through policy formulation, sustainable financing models, building workforce capacity and supporting inter-sectoral partnerships. | 14 (31.8)                                       |
|                                             | 1.1.3 Support the development and implementation of national, person-centred public health policy.                                                                          | 8 (18.2)                                        |
| 1.2 Emergency/disaster response capacity    | 1.2.1 Prepare for health emergencies and disasters and strengthen response capacity to these events.                                                                        | 2 (4.5)                                         |
| 1.3 Expanding reach and reducing inequality | 1.3.1 Improve health coverage and access to healthcare.                                                                                                                     | 1 (2.3)                                         |
|                                             | 1.3.2 Reduce inequalities to accessing health care (socioeconomic, geographic).                                                                                             | 8 (18.2)                                        |
| 1.4 Population health monitoring            | 1.4.1 Enable monitoring of population health.                                                                                                                               | 1 (2.3)                                         |
| Theme 2: Service delivery                   |                                                                                                                                                                             |                                                 |
| No subthemes                                | 2.0.1 Effective, efficient and comprehensive management of NCDs through quality health services and supporting innovation in service delivery.                              | 9 (20.5)                                        |

|                                                                    |                                                                                                                                            |           |
|--------------------------------------------------------------------|--------------------------------------------------------------------------------------------------------------------------------------------|-----------|
|                                                                    | 2.0.2 Support integrated care for people with chronic health conditions.                                                                   | 3 (6.8)   |
|                                                                    | 2.0.3 Positively effect multimorbidity.                                                                                                    | 1 (2.3)   |
|                                                                    | 2.0.4 Support active self-management/active participation by citizens in their health.                                                     | 3 (6.8)   |
| <b>Theme 3: Population health</b>                                  |                                                                                                                                            |           |
| <i>3.1 Targeting risk factors and promoting healthy lifestyles</i> | 3.1.1 Health promotion, including prevention of NCDs, by targeting risk factors, screening and health behaviours across the lifecourse.    | 16 (36.4) |
|                                                                    | 3.1.2 Communicate strategies to reduce use of, and harms related to substance abuse.                                                       | 2 (4.5)   |
|                                                                    | 3.1.3 Decrease prevalence of obesity and overweight.                                                                                       | 2 (4.5)   |
|                                                                    | 3.1.4 Improve population health (physical and mental) and functional ability across the lifecourse, e.g. by increasing healthy life years. | 20 (45.5) |
|                                                                    | 3.1.5 Improve population-level physical activity.                                                                                          | 3 (6.8)   |
| <i>3.2 Reducing impact of disease and injury</i>                   | 3.2.1 Improve population quality of life.                                                                                                  | 9 (20.5)  |
|                                                                    | 3.2.2 Reduce incidence and population impact of diseases (NCDs and/or communicable diseases).                                              | 11 (25.0) |
|                                                                    | 3.2.3 Reduce incidence and population impact of injury.                                                                                    | 2 (4.5)   |
|                                                                    | 3.2.4 Decrease premature mortality from ill-health                                                                                         | 10 (22.7) |

|                                  |                                 |         |
|----------------------------------|---------------------------------|---------|
| 3.3 <i>Environmental factors</i> | 3.3.1 Improve food safety.      | 1 (2.3) |
|                                  | 3.3.2 Improve workplace health. | 1 (2.3) |

NCDs: non-communicable diseases
