# Supplementary material for: Integrated prevention and management of non-communicable diseases, including musculoskeletal health: a systematic policy analysis among OECD countries
Source: PubMed Central journal article supplement — BMJ Glob Health. 2019 Sep 11;4(5):e001806. doi: 10.1136/bmjgh-2019-001806 (PMC6747900; doi:10.1136/bmjgh-2019-001806), 2019-09-11
Supplement: bmjgh-2019-001806supp004.pdf [file bmjgh-2019-001806supp004.pdf]

## Supplementary file 4

Table S4.1 Implementation characteristics of included policies

| Nation    | Policy title (year of publication)                                                                                        | Domains for supporting implementation activities. Information provided (yes/no) |                                                  |                                                           |                                                                                           |
|-----------|---------------------------------------------------------------------------------------------------------------------------|---------------------------------------------------------------------------------|--------------------------------------------------|-----------------------------------------------------------|-------------------------------------------------------------------------------------------|
|           |                                                                                                                           | Implementation priorities outlined                                              | Timelines or phasing for implementation outlined | Financing arrangements to support implementation outlined | Agencies responsible for undertaking or coordinating implementation activities identified |
| Australia | National Strategic Framework for Chronic Conditions (2017)*.                                                              | no                                                                              | yes                                              | no                                                        | yes                                                                                       |
| Belgium   | Chronic disease plan. Integrated health services for better health (2015).                                                | yes                                                                             | no                                               | yes                                                       | Yes                                                                                       |
| Canada    | Integrated Strategy on Healthy Living and Chronic Disease (2005)*.                                                        | no                                                                              | no                                               | yes                                                       | No                                                                                        |
|           | Canada's Tobacco Strategy (2018)*.                                                                                        | no                                                                              | no                                               | no                                                        | yes                                                                                       |
|           | Curbing Childhood Obesity: A Federal, Provincial and Territorial Framework for Action to Promote Healthy Weights (2010)*. | no                                                                              | no                                               | no                                                        | no                                                                                        |
|           | Let's get moving: A                                                                                                       | yes                                                                             | no                                               | no                                                        | yes                                                                                       |

|                |                                                                                                                                         |     |     |     |     |
|----------------|-----------------------------------------------------------------------------------------------------------------------------------------|-----|-----|-----|-----|
|                | common vision for increasing physical activity and reducing sedentary living in Canada (2018)*.                                         |     |     |     |     |
| Chile          | National Health Strategy to complete the Health Objectives of the Decade (2011).                                                        | no  | yes | no  | Yes |
| Czech Republic | HEALTH 2020 National Strategy for Health Protection and Promotion and Disease Prevention (2014)*.                                       | yes | yes | yes | yes |
|                | Long-term program of improving the health status of the population of the Czech Republic - Health for All in the 21st Century (2002)**. | yes | yes | yes | yes |
| Denmark        | Recommendations for preventative services for citizens with chronic diseases (2016).                                                    | yes | no  | yes | yes |
|                | Care pathways for chronic diseases – the generic model (2012).                                                                          | no  | no  | no  | yes |
| Estonia        | National Health Plan 2009–2020 (2012)*.                                                                                                 | yes | yes | yes | yes |

|         |                                                                                                                                                                                                                                       |     |     |     |     |
|---------|---------------------------------------------------------------------------------------------------------------------------------------------------------------------------------------------------------------------------------------|-----|-----|-----|-----|
| France  | Laws Official Journal of the French Republic of January 27th, 2016: Law no 2016-41 January 26th, 2016 of the Modernisation of Our Health System (1). Keynote Title: Mobilizing Health System Members Around a Shared Strategy (2016). | no  | no  | no  | No  |
|         | National Health Strategy: Roadmap (2013).                                                                                                                                                                                             | no  | yes | yes | yes |
| Germany | IN FORM Germany's initiative for healthy nutrition (diet) and more physical activity. National action plan for prevention of malnutrition, lack of physical activity overweight and associated diseases (2014).                       | no  | yes | yes | yes |
| Hungary | "Healthy Hungary 2014-2020" - Health Sector Strategy (2015).                                                                                                                                                                          | yes | yes | no  | yes |
| Iceland | Public health policy and                                                                                                                                                                                                              | yes | yes | yes | yes |

|         |                                                                                                                 |     |     |     |     |
|---------|-----------------------------------------------------------------------------------------------------------------|-----|-----|-----|-----|
|         | actions to encourage a healthier society – with emphasis on children and adolescents under 18 years old (2016). |     |     |     |     |
| Ireland | Tackling Chronic Disease: A Policy Framework for the Management of Chronic Diseases (2008)*.                    | no  | no  | no  | No  |
|         | Healthy Ireland: A framework for improved health and wellbeing 2013 -2025 (2013)*.                              | yes | yes | yes | yes |
| Italy   | National Prevention Plan 2014-2018 (2014).                                                                      | no  | no  | no  | no  |
|         | National Chronicity Plan (2016).                                                                                | no  | no  | no  | no  |
|         | GAINING HEALTH making healthy choices easy (2008).                                                              | no  | no  | no  | no  |
| Japan   | Health Japan 21 (the second term) (2012).                                                                       | no  | no  | no  | yes |
| Korea   | National Health Plan 2020 in Korea (2011)*.                                                                     | yes | yes | yes | yes |
|         | The 3rd National Health Promotion Plan (2011-2020) (2011).                                                      | yes | yes | yes | yes |

|                 |                                                                                                                            |     |     |     |     |
|-----------------|----------------------------------------------------------------------------------------------------------------------------|-----|-----|-----|-----|
| Latvia          | Public Health Guidelines 2014 – 2020 (2014)**.                                                                             | no  | no  | yes | yes |
| Lithuania       | Seimas of the Republic of Lithuania Resolution No XII-964 of Approval of the Lithuanian Health Strategy 2014-2025 (2014)*. | yes | no  | yes | yes |
|                 | The 2014-2020 National Program Progress Horizontal Priority “Health for All” Inter-institutional Operations Plan (2014)**. | yes | yes | yes | yes |
|                 | The National Public Health Care Development Program 2016-2023 (2015)*.                                                     | yes | yes | yes | yes |
| Mexico          | National strategy for the prevention and control of overweight, obesity and diabetes (2013).                               | no  | no  | no  | yes |
| The Netherlands | All about health (2013)*.                                                                                                  | no  | yes | yes | yes |
| Norway          | NCD-Strategy 2013-2017. For the prevention, diagnosis,                                                                     | no  | yes | yes | yes |

|          |                                                                                                                           |     |     |     |     |
|----------|---------------------------------------------------------------------------------------------------------------------------|-----|-----|-----|-----|
|          | treatment and rehabilitation of four noncommunicable diseases: cardiovascular disease, diabetes, COPD and cancer (2013)*. |     |     |     |     |
| Poland   | The National Health Program for the years 2016-2020, Council of Ministers' Decree (2016)**.                               | yes | yes | yes | yes |
| Portugal | National Health Plan 2020 Review and Outreach (2015)**.                                                                   | no  | yes | no  | yes |
| Slovakia | Updated National Health Promotion Program in Slovak Republic (2014)**.                                                    | yes | yes | no  | yes |
| Slovenia | Resolution on National Health Care Plan 2016-2025 (2016)*.                                                                | no  | yes | yes | yes |
| Spain    | Strategy for Addressing Chronicity in the National Health System (2012).                                                  | yes | no  | no  | yes |
| Sweden   | A person centred public health policy (2012).                                                                             | no  | no  | yes | yes |
|          | A cohesive strategy for alcohol, narcotic drugs,                                                                          | no  | no  | yes | yes |

|                |                                                                                                                |     |     |     |     |
|----------------|----------------------------------------------------------------------------------------------------------------|-----|-----|-----|-----|
|                | doping and tobacco (ANDT) policy (2011)*.                                                                      |     |     |     |     |
| Switzerland    | Action plan for the National Strategy on the Prevention of Non-Communicable Diseases (NCD-Strategy) 2017-2024. | no  | yes | yes | yes |
|                | National strategy for the prevention of non-communicable diseases (NCD-Strategy) 2017-2024 (2016).             | no  | yes | yes | yes |
| Turkey         | Multisectoral Action Plan of Turkey for Noncommunicable Diseases 2017-2025 (2017)*.                            | no  | yes | no  | yes |
| United Kingdom | Living Well for Longer: A call to action to reduce avoidable premature mortality (2013)*.                      | yes | no  | yes | yes |
| United States  | National Prevention Council Action Plan: Implementing the National Prevention Strategy (2012)*.                | yes | no  | yes | yes |

\* source document published in English; \*\* source document translated to English
